# Supplementary material for: Trends and inequalities in the uptake of at least three doses of intermittent preventive treatment (IPTp3⁺) among pregnant women in Ghana, 2003–2022
Source: Research Square preprint supplement (doi:10.21203/rs.3.rs-7574280/v1), 2025-10-29
Supplement: Supplementary file 1 [file 18eb38e0ded89bdb54a2e208.docx]

**Supplementary Table 1: Trends in** **the use of at least three doses of IPTp among pregnant women in Ghana by different inequality dimensions, 2003-2022**

|  | **2003** | | **2008** | | **2014** | | **2022** | |
| --- | --- | --- | --- | --- | --- | --- | --- | --- |
| **Dimension** | **N** | **Percentage (%)** | **N** | **Percentage (%)** | **N** | **Percentage (%)** | **N** | **Percentage (%)** |
| **Economic status** |  |  |  |  |  |  |  |  |
| Quintile 1 (poorest) | 373 | 1.3 | 283 | 18.8 | 519 | 37.0 | 853 | 54.3 |
| Quintile 2 (poorer) | 319 | 0.5 | 261 | 28.0 | 474 | 36.1 | 723 | 55.7 |
| Quintile 3 (middle) | 284 | 0.5 | 222 | 27.6 | 433 | 36.2 | 705 | 61.0 |
| Quintile 4 (richer) | 235 | 1.0 | 243 | 33.1 | 444 | 34.9 | 631 | 65.2 |
| Quintile 5 (richest) | 210 | 0.6 | 169 | 36.8 | 393 | 50.8 | 579 | 68.3 |
| **Educational status** |  |  |  |  |  |  |  |  |
| No education | 572 | 0.3 | 363 | 21.0 | 606 | 34.7 | 728 | 52.4 |
| Primary education | 322 | 0.5 | 288 | 26.5 | 431 | 34.1 | 542 | 57.7 |
| Secondary education | 509 | 1.7 | 493 | 32.7 | 1123 | 41.4 | 1898 | 63.2 |
| Higher education | - | - | 33 | 50.0 | 104 | 51.0 | 323 | 64.9 |
| **Place of residence** |  |  |  |  |  |  |  |  |
| Rural | 944 | 0.9 | 723 | 26.9 | 1255 | 35.9 | 1868 | 58.0 |
| Urban | 477 | 0.8 | 455 | 29.8 | 1009 | 42.0 | 1623 | 62.8 |
| **Subnational region** |  |  |  |  |  |  |  |  |
| Ashanti | 245 | 1.3 | 215 | 29.2 | 397 | 40.0 | 631 | 49.9 |
| Ahafo | 158 | 0.3 | 107 | 47.3 | 214 | 51.5 | 77 | 58.3 |
| Central | 120 | 0.8 | 123 | 22.6 | 258 | 32.2 | 357 | 65.6 |
| Eastern | 142 | 0.0 | 105 | 29.0 | 206 | 42.0 | 246 | 73.1 |
| Greater Accra | 150 | 1.8 | 133 | 28.6 | 332 | 35.3 | 410 | 64.8 |
| Northern | 208 | 0.0 | 177 | 15.8 | 304 | 36.4 | 395 | 44.4 |
| Upper East | 86 | 2.0 | 63 | 25.2 | 95 | 30.6 | 191 | 78.8 |
| Upper West | 49 | 1.5 | 36 | 26.3 | 64 | 39.2 | 105 | 77.9 |
| Volta | 134 | 1.6 | 107 | 36.1 | 177 | 33.3 | 130 | 70.7 |
| Western | 128 | 0.0 | 111 | 25.5 | 217 | 43.9 | 208 | 61.9 |
| Bono | - | - | - | - | - | - | 113 | 66.6 |
| Bono East | - | - | - | - | - | - | 191 | 65.1 |
| North East | - | - | - | - | - | - | 112 | 59.9 |
| Oti | - | - | - | - | - | - | 123 | 51.9 |
| Savannah | - | - | - | - | - | - | 105 | 51.7 |
| Western North | - | - | - | - | - | - | 96 | 51.8 |

-: Not available
